# Supplementary material
Source: PubMed Central journal article supplement (PMC8040636)
Supplement: pnas.2016337118.sapp.pdf [file pnas.2016337118.sapp.pdf]

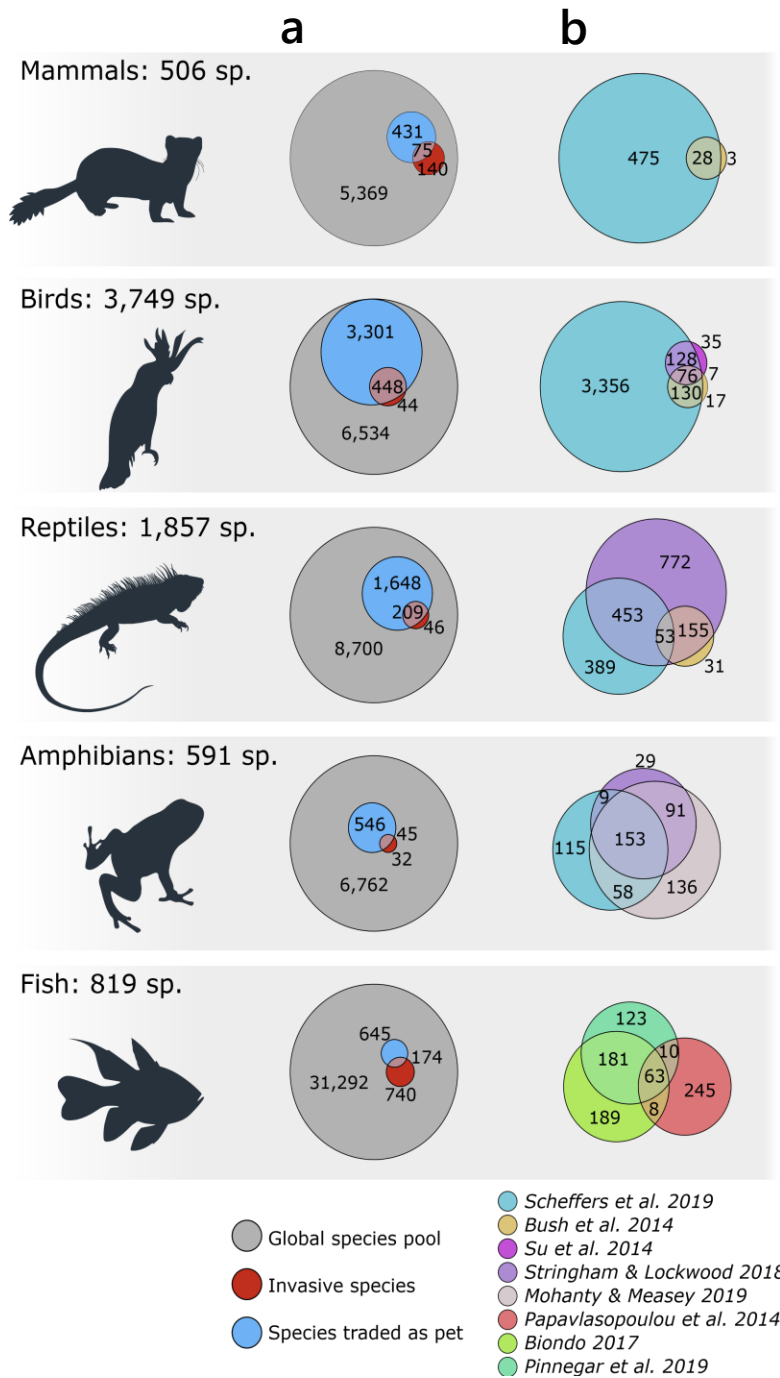

**Figure S1. Euler diagram of the overlap between datasets used for studying the global pet trade. (A) Overlap between invasive and traded species, for each taxonomic group. (B) Overlap between the different pet trade datasets used, for each taxonomic group.**

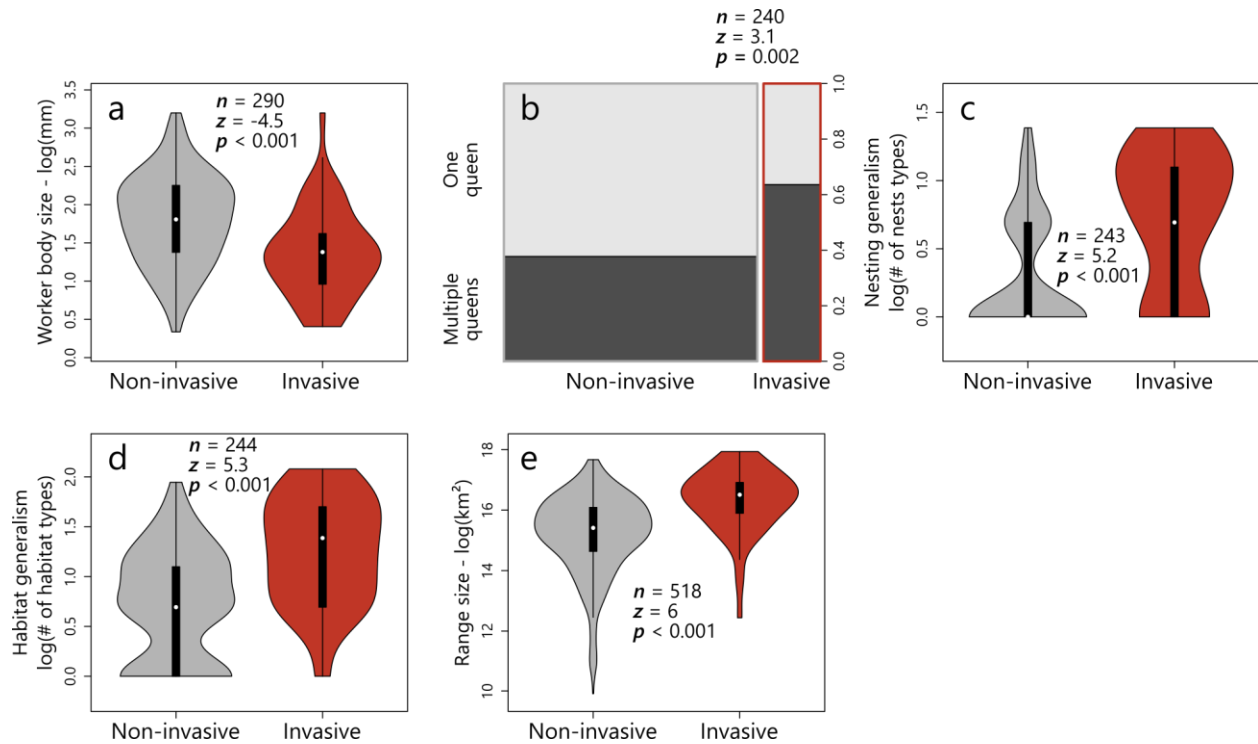

**Figure S2. Characteristics of ants that are associated with invasiveness.** We used univariate binomial GLMs to test the links between invasiveness and five ant species' characteristics: **(A)** worker body size, **(B)** Number of queens, **(C)** Nesting generalism, **(D)** Habitat generalism and **(E)** Range size. Sample size ( $n$ ), tests' statistics ( $z$ ) and p-values ( $p$ ) are indicate in each panel. **(A, C, D, E)** Violin plots show the probability density of the data at different values (y axes). **(B)** Proportion (y axis; on the right) of monogynous (light grey) and polygynous (dark grey) species in non-invasive ( $n = 196$ ) and invasive ( $n = 44$ ) species. The width of the bars is relative to the number of species in each group.

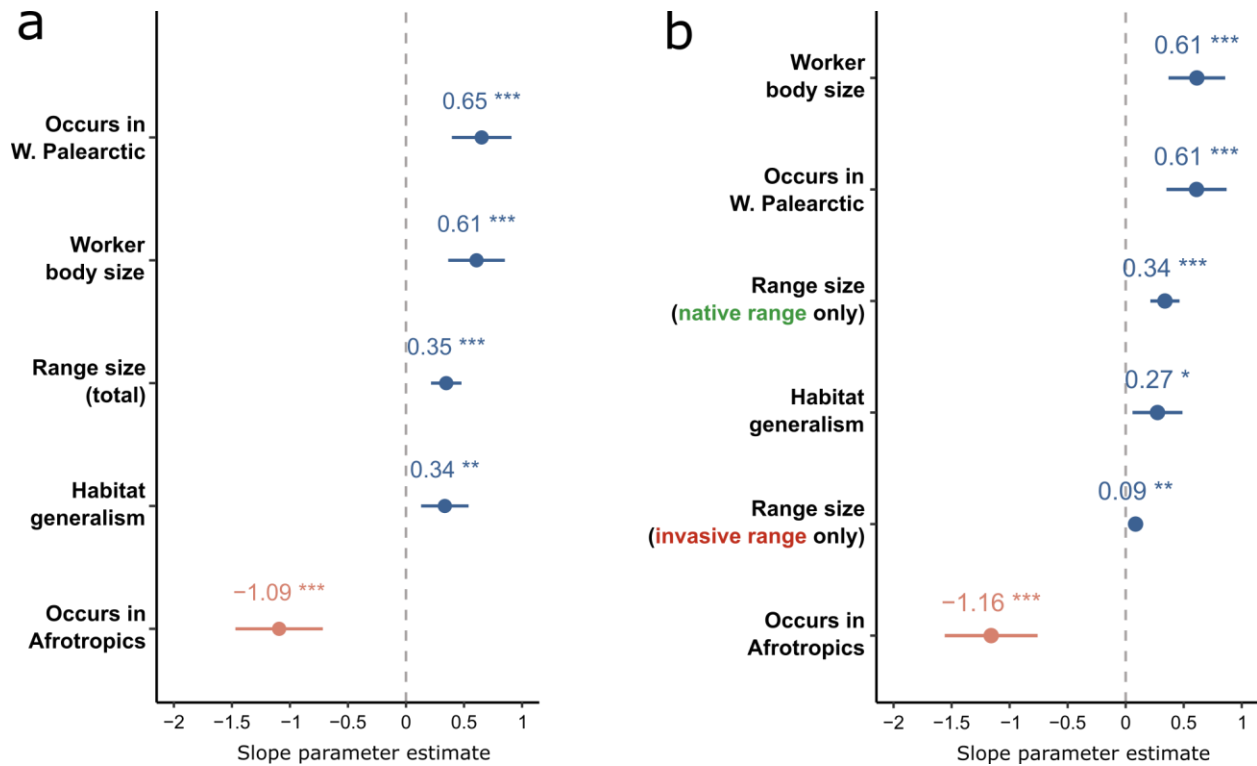

**Figure S3. Predictors' estimates of the best-fitting model explaining ants' commercial success.** For (A) the model considering the total range size (native and invasive parts of the range together) and (B) the model considering native and invasive parts of the range size as separate predictors. Dots represent mean estimates and associated lines 95% confidence intervals. Asterisks represent significant difference from 0 (\*\*\*:  $P < 0.001$ , \*\*:  $P < 0.01$ , \*:  $P < 0.05$  and .:  $P < 0.1$ ).

**Table S1. Invasive species overrepresentation in plants, vertebrates and ants traded as pets and ornamentals.**

| Traded taxon (Information source)                       | Number of species in global pool | Number of invasive species in global pool | Percent of global | Number of traded species | Number of traded invasive species | Percent of traded | Degree of overrepresentation | $\chi^2$ test                                   | Sources (global and traded species pools)             |
|---------------------------------------------------------|----------------------------------|-------------------------------------------|-------------------|--------------------------|-----------------------------------|-------------------|------------------------------|-------------------------------------------------|-------------------------------------------------------|
| Plants (Global - Internet trade)                        | 110,498                          | 542                                       | 0.49              | 1,798                    | 206                               | 11.46             | <b>23.4</b>                  | $\chi^2 = 4448.6$ ;<br>$df = 1$<br>$P < 0.0001$ | Humair et al. 2015                                    |
| Marine and freshwater fish (Greece - Pet shops 2011)    | 32,851                           | 914                                       | 2.78              | 326                      | 119                               | 36.50             | <b>13.1</b>                  | $\chi^2 = 1370.5$ ;<br>$df = 1$<br>$P < 0.0001$ | www.fishbase.org<br>Papavasopoulou et al. 2014        |
| Marine fish (Switzerland - Importations 2009)           | 13,778                           | 261                                       | 1.89              | 408                      | 56                                | 13.73             | <b>7.2</b>                   | $\chi^2 = 307.3$ ;<br>$df = 1$<br>$P < 0.0001$  | www.fishbase.org<br>Biondo 2017                       |
| Marine fish (England - Aquarium shops 2011)             |                                  |                                           |                   | 344                      | 54                                | 15.70             | <b>8.3</b>                   | $\chi^2 = 352.7$ ;<br>$df = 1$<br>$P < 0.0001$  | www.fishbase.org<br>Pinnegar & Murray 2019            |
| Mammals (Global - CITES & IUCN)                         | 6,015                            | 215                                       | 3.57              | 503                      | 75                                | 14.91             | <b>4.2</b>                   | $\chi^2 = 146.9$ ;<br>$df = 1$<br>$P < 0.0001$  | www.mammaldiversity.org<br>Scheffers et al. 2019      |
| Mammals (Global - CITES & literature review 2006-2012)  |                                  |                                           |                   | 31                       | 8                                 | 25.81             | <b>7.2</b>                   | $\chi^2 = 44.1$ ;<br>$df = 1$<br>$P < 0.0001$   | www.mammaldiversity.org<br>Bush et al. 2014           |
| Birds (Global - CITES & IUCN)                           | 10,327                           | 492                                       | 4.76              | 3,690                    | 438                               | 11.87             | <b>2.5</b>                   | $\chi^2 = 410.6$ ;<br>$df = 1$<br>$P < 0.0001$  | www.birds.cornell.edu<br>Scheffers et al. 2019        |
| Birds (Global - CITES & literature review 2006-2012)    |                                  |                                           |                   | 230                      | 81                                | 35.22             | <b>7.4</b>                   | $\chi^2 = 470.1$ ;<br>$df = 1$<br>$P < 0.0001$  | www.birds.cornell.edu<br>Bush et al. 2014             |
| Birds (Taiwan - Pet shops 2012)                         |                                  |                                           |                   | 246                      | 70                                | 28.46             | <b>6.0</b>                   | $\chi^2 = 304.3$ ;<br>$df = 1$<br>$P < 0.0001$  | www.birds.cornell.edu<br>Su et al. 2014               |
| Reptiles (Global - CITES & IUCN)                        | 10,603                           | 255                                       | 2.40              | 899                      | 86                                | 9.57              | <b>4.0</b>                   | $\chi^2 = 196.4$ ;<br>$df = 1$<br>$P < 0.0001$  | www.reptile-database.org<br>Scheffers et al. 2019     |
| Reptiles (Global - CITES & literature review 2006-2012) |                                  |                                           |                   | 243                      | 74                                | 30.45             | <b>12.7</b>                  | $\chi^2 = 814.4$ ;<br>$df = 1$<br>$P < 0.0001$  | www.reptile-database.org<br>Bush et al. 2014          |
| Reptiles (USA - LEMIS + internet trade)                 |                                  |                                           |                   | 1,433                    | 196                               | 13.68             | <b>5.7</b>                   | $\chi^2 = 775.8$ ;<br>$df = 1$<br>$P < 0.0001$  | www.reptile-database.org<br>Stringham & Lockwood 2018 |
| Amphibians (Global - CITES & IUCN)                      | 7,385                            | 77                                        | 1.04              | 335                      | 28                                | 8.36              | <b>8.0</b>                   | $\chi^2 = 173.8$ ;<br>$df = 1$<br>$P < 0.0001$  | www.amphibiaweb.org<br>Scheffers et al. 2019          |
| Amphibians (Global - Literature review 1971-2018)       |                                  |                                           |                   | 438                      | 41                                | 9.36              | <b>9.0</b>                   | $\chi^2 = 293.7$ ;<br>$df = 1$<br>$P < 0.0001$  | www.amphibiaweb.org<br>Mohanty & Measey 2019          |
| Amphibians (USA - LEMIS + internet trade)               |                                  |                                           |                   | 282                      | 26                                | 9.22              | <b>8.8</b>                   | $\chi^2 = 182.8$ ;<br>$df = 1$<br>$P < 0.0001$  | www.amphibiaweb.org<br>Stringham & Lockwood 2018      |
| Ants (Global internet trade)                            | 15,377                           | 255                                       | 1.66              | 520                      | 57                                | 10.96             | <b>6.6</b>                   | $\chi^2 = 276$ ;<br>$df = 1$<br>$P < 0.0001$    | www.antmaps.org<br>This study                         |

**Table S2. Internet search for websites selling ants. Search expression used to detect websites on Google search.**

| Language                    | Search expressions         |                             |                                  |                              |                                  |                                |
|-----------------------------|----------------------------|-----------------------------|----------------------------------|------------------------------|----------------------------------|--------------------------------|
| <b>English</b>              | <b>buy living ants</b>     | <b>buy queen ant</b>        | <b>buy ant colony</b>            | <b>living ants for sale</b>  | <b>queen ant for sale</b>        | <b>ant colony for sale</b>     |
| <b>Arabic</b>               | شراء النمل المعيشة         | شراء ملكة النمل             | شراء مستعمرة النمل               | النمل المعيشة للبيع          | ملكة النمل للبيع                 | مستعمرة النمل للبيع            |
| <b>Chinese (simplified)</b> | 买活蚂蚁                       | 购买蚁后                        | 购买蚁群                             | 出售活蚂蚁                        | 蚁后出售                             | 蚂蚁殖民地出售                        |
| <b>Dutch</b>                | koop levende mieren        | koop koningin mier          | koop mierenkolonie               | levende mieren te koop       | koningin mier te koop            | mierenkolonie te koop          |
| <b>Finnish</b>              | ostaa eläviä muurahaisia   | osta kuningatar muurahainen | osta muurahaiskolonia            | eläviä muurahaisia myytävänä | kuningatar muurahainen myytävänä | ant kolonia myytävänä          |
| <b>French</b>               | acheter fourmis vivantes   | acheter reine de fourmi     | acheter colonie de fourmis       | fourmis vivantes à vendre    | reine de fourmi à vendre         | colonie de fourmis à vendre    |
| <b>German</b>               | kaufen Sie lebende Ameisen | kaufen Sie Königin Ameise   | ameisenkolonie kaufen            | lebende Ameisen zu verkaufen | königin Ameise zu verkaufen      | ameisenkolonie zu verkaufen    |
| <b>Hindi</b>                | जीवित चींटियों को खरीदे    | रानी चींटी खरीदे            | चींटी कॉलोनी खरीदे               | बिक्री के लिए जीवित चींटियों | बिक्री के लिए रानी चींटी         | बिक्री के लिए चींटी कॉलोनी     |
| <b>Italian</b>              | Compra le formiche viventi | acquista formica regina     | acquista una colonia di formiche | formiche vive in vendita     | Formica regina in vendita        | colonia di formiche in vendita |
| <b>Japanese</b>             | 生きているアリをかう                 | 女王アリをかう                     | アリのコロニーを購入する                     | 生きているアリ                      | 女王アリ                             | アリのコロニー販売                      |
| <b>Korean</b>               | 살아있는 개미를 사다                | 여왕 개미를 사다                   | 개미 식민지 구매                        | 살아있는 개미 판매                   | 여왕 개미 판매                         | 개미 식민지 판매                      |
| <b>Malay</b>                | membeli semut hidup        | beli semut ratu             | beli koloni semut                | semut hidup untuk dijual     | semut ratu untuk dijual          | koloni semut untuk dijual      |
| <b>Persian</b>              | مورچه های زنده بخريد       | مورچه ملکه را بخريد         | کلونی مورچه را بخريد             | مورچه های زنگی برای فروش     | مورچه ملکه برای فروش             | مستعمرة مورچه برای فروش        |
| <b>Polish</b>               | kup żywe mrówki            | kup królową mrówkę          | kup kolonię mrówek               | żywe mrówki na sprzedaż      | królowa mrówek na sprzedaż       | kolonia mrówek na sprzedaż     |
| <b>Portuguese</b>           | comprar formigas vivas     | comprar formiga rainha      | comprar colónia de formigas      | formigas vivas à venda       | formiga rainha para venda        | colónia de formigas à venda    |
| <b>Russian</b>              | купить живых муравьев      | купить королеву муравьев    | купить муравьиную колонию        | живые муравьи на продажу     | королева муравьев для продажи    | колония муравьев для продажи   |
| <b>Spanish</b>              | comprar hormigas vivas     | comprar reina de hormiga    | comprar colonia de hormigas      | hormigas vivas en venta      | reina de hormigas en venta       | colonia de hormigas en venta   |
| <b>Swedish</b>              | köpa levande myror         | köp drottning myr           | köp myrkoloni                    | levande myror till salu      | drottningmyr till salu           | myrkoloni till salu            |
| <b>Turkish</b>              | canlı karıncalar satın al  | kraliçe karınca satın al    | karınca kolonisi satın Alın      | satılık yaşayan karıncalar   | satılık kraliçe karınca          | satılık karınca kolonisi       |
| <b>Vietnamese</b>           | mua kiến sống              | mua kiến chúa               | mua đàn kiến                     | kiến sống để bán             | kiến chúa để bán                 | bán kiến                       |

**Table S3.** List of the 65 websites selling ant colonies detected in 2017. Each website corresponds to one seller, except for one (www.antcanada.com) which is a platform where ant sellers can register and propose ants for sale. This website corresponded, at the time of the survey, to 45 sellers (we considered one seller by country or states for North America). The internet archive tool Webarchive (<http://web.archive.org/>) can be used to visit past version of the websites.

| Website                                                                                                                                                                                                                                                                                                                                   | Country      | Year of first activity | Number of species sold |
|-------------------------------------------------------------------------------------------------------------------------------------------------------------------------------------------------------------------------------------------------------------------------------------------------------------------------------------------|--------------|------------------------|------------------------|
| <a href="http://hormigalia.com">http://hormigalia.com</a>                                                                                                                                                                                                                                                                                 | Spain        | 2002                   | 5                      |
| <a href="http://www.antstore.net">www.antstore.net</a>                                                                                                                                                                                                                                                                                    | Germany      | 2003                   | 338                    |
| <a href="http://www.ant-home.idv.tw/888/shopping/shopping-Product/shopping-p-ant/shopping-p-a16.htm">http://www.ant-home.idv.tw/888/shopping/shopping-Product/shopping-p-ant/shopping-p-a16.htm</a>                                                                                                                                       | Taiwan       | 2006                   | 13                     |
| <a href="http://www.fourmis.fr">www.fourmis.fr</a>                                                                                                                                                                                                                                                                                        | France       | 2006                   | 4                      |
| <a href="http://www.bugdesign.com.ua/ant-colonies/">www.bugdesign.com.ua/ant-colonies/</a>                                                                                                                                                                                                                                                | Ukraine      | 2006                   | 12                     |
| <a href="http://www.ants-kalytta.com">www.ants-kalytta.com</a>                                                                                                                                                                                                                                                                            | Germany      | 2007                   | 119                    |
| <a href="http://www.ongewoonongewerveld.nl">www.ongewoonongewerveld.nl</a>                                                                                                                                                                                                                                                                | Netherlands  | 2008                   | 3                      |
| <a href="http://www.antshop.ru">www.antshop.ru</a>                                                                                                                                                                                                                                                                                        | Russia       | 2008                   | 9                      |
| <a href="http://www.anthouse.es">www.anthouse.es</a>                                                                                                                                                                                                                                                                                      | Spain        | 2008                   | 10                     |
| <a href="http://arinko-spot.com/SHOP/16561/list.html">http://arinko-spot.com/SHOP/16561/list.html</a>                                                                                                                                                                                                                                     | Japan        | 2010                   | 3                      |
| <a href="http://www.fourmishome.fr">www.fourmishome.fr</a>                                                                                                                                                                                                                                                                                | France       | 2010                   | 55                     |
| <a href="http://fourmis-boutique.fr">http://fourmis-boutique.fr</a>                                                                                                                                                                                                                                                                       | France       | 2010                   | 31                     |
| <a href="http://www.world-of-ants.com">www.world-of-ants.com</a>                                                                                                                                                                                                                                                                          | Germany      | 2010                   | 239                    |
| <a href="http://www.mierenboerderij.nl">www.mierenboerderij.nl</a>                                                                                                                                                                                                                                                                        | Netherlands  | 2010                   | 4                      |
| <a href="http://www.antscanada.com">www.antscanada.com</a>                                                                                                                                                                                                                                                                                | Canada       | 2010                   | 149                    |
| <a href="http://antroom.cart.fc2.com">http://antroom.cart.fc2.com</a>                                                                                                                                                                                                                                                                     | Japan        | 2011                   | 19                     |
| <a href="http://antsuk.com">http://antsuk.com</a>                                                                                                                                                                                                                                                                                         | UK           | 2011                   | 6                      |
| <a href="http://www.antsfromasia.com">www.antsfromasia.com</a>                                                                                                                                                                                                                                                                            | UK           | 2011                   | 12                     |
| <a href="http://www.fourmis-city.com">www.fourmis-city.com</a>                                                                                                                                                                                                                                                                            | France       | 2012                   | 24                     |
| <a href="http://www.antdealer.com">www.antdealer.com</a>                                                                                                                                                                                                                                                                                  | Germany      | 2012                   | 45                     |
| <a href="http://www.mrowkoyad.pl">www.mrowkoyad.pl</a>                                                                                                                                                                                                                                                                                    | Poland       | 2012                   | 22                     |
| <a href="http://www.tropicalhouse.co.uk">www.tropicalhouse.co.uk</a>                                                                                                                                                                                                                                                                      | UK           | 2012                   | 2                      |
| <a href="http://www.tropicalhouse.co.uk">www.tropicalhouse.co.uk</a>                                                                                                                                                                                                                                                                      | UK           | 2012                   | 2                      |
| <a href="http://www.empireofants.com/onlineshop/">www.empireofants.com/onlineshop/</a>                                                                                                                                                                                                                                                    | Taiwan       | 2013                   | 21                     |
| <a href="https://myants.de">https://myants.de</a>                                                                                                                                                                                                                                                                                         | Germany      | 2013                   | 22                     |
| <a href="http://antplanet.ru">http://antplanet.ru</a>                                                                                                                                                                                                                                                                                     | Russia       | 2013                   | 20                     |
| <a href="http://petsfunny.ru/nasekomye/muravi/">http://petsfunny.ru/nasekomye/muravi/</a>                                                                                                                                                                                                                                                 | Russia       | 2013                   | 25                     |
| <a href="http://昆虫-アリの飼育-販売のアントファーム.com/html/ari_itiran.html">http://昆虫-アリの飼育-販売のアントファーム.com/html/ari_itiran.html</a>                                                                                                                                                                                                                     | Japan        | 2013                   | 2                      |
| <a href="https://murashdom.ru">https://murashdom.ru</a>                                                                                                                                                                                                                                                                                   | Russia       | 2014                   | 18                     |
| <a href="https://antkit.uk">https://antkit.uk</a>                                                                                                                                                                                                                                                                                         | UK           | 2014                   | 3                      |
| <a href="http://www.microfaune.com">www.microfaune.com</a>                                                                                                                                                                                                                                                                                | France       | 2015                   | 8                      |
| <a href="http://www.exotic-ants.de">www.exotic-ants.de</a>                                                                                                                                                                                                                                                                                | Germany      | 2015                   | 18                     |
| <a href="http://www.simants.de">www.simants.de</a>                                                                                                                                                                                                                                                                                        | Germany      | 2015                   | 3                      |
| <a href="http://www.britishants.com">www.britishants.com</a>                                                                                                                                                                                                                                                                              | UK           | 2015                   | 25                     |
| <a href="http://antcity.in.ua/collection/muravi">http://antcity.in.ua/collection/muravi</a>                                                                                                                                                                                                                                               | Ukraine      | 2015                   | 4                      |
| <a href="https://planetexotic.ru/zivotnye/muravi/">https://planetexotic.ru/zivotnye/muravi/</a>                                                                                                                                                                                                                                           | Russia       | 2015                   | 13                     |
| <a href="http://www.surungenpazari.com/AhKategoriler.aspx?id=152">www.surungenpazari.com/AhKategoriler.aspx?id=152</a>                                                                                                                                                                                                                    | Turkey       | 2015                   | 2                      |
| <a href="http://www.ants-squadshop.com">www.ants-squadshop.com</a>                                                                                                                                                                                                                                                                        | Taiwan       | 2016                   | 28                     |
| <a href="http://www.gamergate.com.au">www.gamergate.com.au</a>                                                                                                                                                                                                                                                                            | Australia    | 2016                   | 25                     |
| <a href="http://www.mierenspecialist.nl">www.mierenspecialist.nl</a>                                                                                                                                                                                                                                                                      | Netherlands  | 2016                   | 14                     |
| <a href="http://4ants.ru/collection/muravi">http://4ants.ru/collection/muravi</a>                                                                                                                                                                                                                                                         | Russia       | 2016                   | 3                      |
| <a href="http://www.antskingdom.com">www.antskingdom.com</a>                                                                                                                                                                                                                                                                              | UK           | 2016                   | 3                      |
| <a href="http://www.antkeeping.co.uk">www.antkeeping.co.uk</a>                                                                                                                                                                                                                                                                            | UK           | 2016                   | 2                      |
| <a href="http://www.leafcuttingants.com">www.leafcuttingants.com</a>                                                                                                                                                                                                                                                                      | UK           | 2016                   | 1                      |
| <a href="https://antshome.at">https://antshome.at</a>                                                                                                                                                                                                                                                                                     | Austria      | 2016                   | 11                     |
| <a href="http://www.antworldafrica.com">www.antworldafrica.com</a>                                                                                                                                                                                                                                                                        | South Africa | 2017                   | 4                      |
| <a href="http://antmalaysia.wixsite.com/mysite">http://antmalaysia.wixsite.com/mysite</a>                                                                                                                                                                                                                                                 | Malaysia     | 2017                   | 5                      |
| <a href="http://antshungary.com">http://antshungary.com</a>                                                                                                                                                                                                                                                                               | Hungary      | 2017                   | 26                     |
| <a href="http://www.antnederland.nl">www.antnederland.nl</a>                                                                                                                                                                                                                                                                              | Netherlands  | 2017                   | 2                      |
| <a href="http://www.mundhormiga.com">www.mundhormiga.com</a>                                                                                                                                                                                                                                                                              | Spain        | 2017                   | 8                      |
| <a href="http://www.ameisenshop.ch">www.ameisenshop.ch</a>                                                                                                                                                                                                                                                                                | Switzerland  | 2017                   | 3                      |
| <a href="http://www.ameisenhaltung.ch">www.ameisenhaltung.ch</a>                                                                                                                                                                                                                                                                          | Switzerland  | 2017                   | 18                     |
| <a href="http://www.antsmynala.co.uk">www.antsmynala.co.uk</a>                                                                                                                                                                                                                                                                            | UK           | 2017                   | 38                     |
| <a href="http://www.antsrus.com">www.antsrus.com</a>                                                                                                                                                                                                                                                                                      | UK           | 2017                   | 13                     |
| <a href="http://www.occultusants.com">www.occultusants.com</a>                                                                                                                                                                                                                                                                            | UK           | 2017                   | 2                      |
| <a href="http://117colonies.com">http://117colonies.com</a>                                                                                                                                                                                                                                                                               | USA          | 2017                   | 10                     |
| <a href="https://ausants.com">https://ausants.com</a>                                                                                                                                                                                                                                                                                     | Australia    | 2017                   | 15                     |
| <a href="https://hailesaquiriums.com">https://hailesaquiriums.com</a>                                                                                                                                                                                                                                                                     | Australia    | 2017                   | 3                      |
| <a href="http://www.mondoformiche.it">www.mondoformiche.it</a>                                                                                                                                                                                                                                                                            | Italy        | 2017                   | 17                     |
| <a href="http://www.antnederland.nl">www.antnederland.nl</a>                                                                                                                                                                                                                                                                              | Netherlands  | 2017                   | 2                      |
| <a href="http://www.antforall.co.uk">www.antforall.co.uk</a>                                                                                                                                                                                                                                                                              | UK           | 2017                   | 2                      |
| <a href="https://aimayi.world.taobao.com/category-951704253.htm?spm=a312a.7700824.w4010-9325627583.8.4b83bb9z0KqE&amp;search=y&amp;catName=%BE%AB%C6%B7%C2%EC%D2%CF%bd">https://aimayi.world.taobao.com/category-951704253.htm?spm=a312a.7700824.w4010-9325627583.8.4b83bb9z0KqE&amp;search=y&amp;catName=%BE%AB%C6%B7%C2%EC%D2%CF%bd</a> | China        | na                     | 52                     |
| <a href="https://antssingapore.wixsite.com/ants">https://antssingapore.wixsite.com/ants</a>                                                                                                                                                                                                                                               | Singapore    | na                     | 3                      |
| <a href="http://www.antmate.com.au">www.antmate.com.au</a>                                                                                                                                                                                                                                                                                | Australia    | na                     | 7                      |
| <a href="http://www.antcenter.pl">www.antcenter.pl</a>                                                                                                                                                                                                                                                                                    | Poland       | na                     | 18                     |

**Table S4.** The geography of the global ant trade. Contingency table representing the number of species from each ecozone (i.e. assuming that species were harvested in their native range) traded by sellers from each ecozone. Values correspond to Fig. 2.

|            | Species Native range |    |    |     |     |     |     | Number of sellers |
|------------|----------------------|----|----|-----|-----|-----|-----|-------------------|
|            | Af                   | Au | In | Nea | Neo | EPa | WPa |                   |
| <b>Af</b>  | 4                    | 0  | 0  | 0   | 0   | 0   | 0   | 1                 |
| <b>Au</b>  | 0                    | 31 | 0  | 0   | 0   | 0   | 0   | 6                 |
| <b>In</b>  | 10                   | 8  | 72 | 8   | 12  | 6   | 14  | 11                |
| <b>Nea</b> | 0                    | 1  | 2  | 64  | 3   | 2   | 3   | 28                |
| <b>Neo</b> | 0                    | 0  | 0  | 0   | 5   | 0   | 0   | 2                 |
| <b>EPa</b> | 0                    | 3  | 5  | 0   | 0   | 14  | 0   | 3                 |
| <b>WPa</b> | 18                   | 33 | 72 | 30  | 85  | 47  | 132 | 58                |

**Table S5.** Parameter estimates and statistics for the best-fitting model. **(A)** When the model is fitted with the total range size (native + invasive). **(B)** When the model is fitted using native and invasive range size as two separate variables.

| <b>a</b>                            | <b>Predictor</b>               | <b>Slope <math>\pm</math> s.e.</b> | <b>z value</b> | <b>P</b> |     |
|-------------------------------------|--------------------------------|------------------------------------|----------------|----------|-----|
|                                     | Intercept                      | -5.7 $\pm$ 1.10                    | -5.18          | <0.0001  | *** |
| <b>Possible geographical origin</b> | Occurs in W. Palearctic        | 0.65 $\pm$ 0.13                    | 4.98           | <0.0001  | *** |
|                                     | Occurs in Afrotropics          | -1.09 $\pm$ 0.19                   | -5.69          | <0.0001  | *** |
| <b>Traits link to invasiveness</b>  | Range size (native + invasive) | 0.34 $\pm$ 0.07                    | 5.18           | <0.0001  | *** |
|                                     | Worker body size               | 0.61 $\pm$ 0.13                    | 4.89           | <0.0001  | *** |
|                                     | Habitat generalism             | 0.33 $\pm$ 0.10                    | 3.21           | 0.001    | **  |

  

| <b>b</b>                            | <b>Predictor</b>        | <b>Slope <math>\pm</math> s.e.</b> | <b>z value</b> | <b>P</b> |     |
|-------------------------------------|-------------------------|------------------------------------|----------------|----------|-----|
|                                     | Intercept               | -6.33 $\pm$ 1.13                   | -5.63          | <0.0001  | *** |
| <b>Possible geographical origin</b> | Occurs in W. Palearctic | 0.61 $\pm$ 0.13                    | 4.61           | <0.0001  | *** |
|                                     | Occurs in Afrotropics   | -1.16 $\pm$ 0.20                   | -5.68          | <0.0001  | *** |
| <b>Traits link to invasiveness</b>  | Native range size       | 0.34 $\pm$ 0.06                    | 5.27           | <0.0001  | *** |
|                                     | Invasive range size     | 0.09 $\pm$ 0.03                    | 2.74           | 0.006    | **  |
|                                     | Worker body size        | 0.61 $\pm$ 0.13                    | 4.92           | <0.0001  | *** |
|                                     | Habitat generalism      | 0.27 $\pm$ 0.11                    | 2.5            | 0.013    | *   |
